# Supplementary material for: Phloretin induces cell cycle arrest and apoptosis of human glioblastoma cells through the generation of reactive oxygen species
Source: Springer Nature journal article supplement (doi:10.1007/s11060-016-2107-z), 2016-03-16
Supplement: MOESM1 [file 8951820]

**Supplementary table 1. Results of Figure 1 panel C: absorbance of OD450 of U87**

| time | Phloretin(μM) | data1 | data2 | data3 | Mean | Std. Deviation | P value  (compare to control) |
| --- | --- | --- | --- | --- | --- | --- | --- |
| 12h | 0 | 0.663 | 0.686 | 0.79 | 0.713 | 0.067 |  |
|  | 100 | 0.522 | 0.709 | 0.771 | 0.667 | 0.129 | ns |
|  | 150 | 0.568 | 0.796 | 0.622 | 0.662 | 0.119 | ** |
|  | 200 | 0.564 | 0.532 | 0.602 | 0.566 | 0.035 | *** |
|  | 250 | 0.511 | 0.686 | 0.672 | 0.623 | 0.097 | *** |
|  | 300 | 0.528 | 0.516 | 0.497 | 0.513 | 0.015 | *** |
| 24h | 0 | 0.77 | 0.874 | 0.7 | 0.781 | 0.087 |  |
|  | 100 | 0.676 | 0.796 | 0.769 | 0.747 | 0.062 | ns |
|  | 150 | 0.577 | 0.722 | 0.723 | 0.674 | 0.084 | * |
|  | 200 | 0.621 | 0.545 | 0.604 | 0.59 | 0.039 | ** |
|  | 250 | 0.651 | 0.566 | 0.608 | 0.608 | 0.042 | *** |
|  | 300 | 0.548 | 0.458 | 0.53 | 0.512 | 0.047 | *** |
| 48h | 0 | 1.88 | 1.818 | 1.685 | 1.794 | 0.099 |  |
|  | 100 | 1.427 | 1.625 | 1.645 | 1.565 | 0.120 | ns |
|  | 150 | 1.338 | 1.501 | 1.588 | 1.475 | 0.126 | *** |
|  | 200 | 1.204 | 1.171 | 1.46 | 1.278 | 0.158 | *** |
|  | 250 | 1.159 | 1.191 | 1.266 | 1.205 | 0.054 | *** |
|  | 300 | 0.811 | 0.947 | 0.937 | 0.898 | 0.075 | *** |

**Supplementary table 2. Results of Figure 1 panel C: absorbance of OD450 of U251**

| time | Phloretin(μM) | data1 | data2 | data3 | Mean | Std. Deviation | P value (compare to control) |
| --- | --- | --- | --- | --- | --- | --- | --- |
| 12h | 0 | 0.497 | 0.518 | 0.513 | 0.509 | 0.010 |  |
|  | 100 | 0.477 | 0.495 | 0.496 | 0.489 | 0.010 | ns |
|  | 150 | 0.426 | 0.47 | 0.433 | 0.443 | 0.023 | ns |
|  | 200 | 0.382 | 0.397 | 0.406 | 0.395 | 0.012 | ns |
|  | 250 | 0.405 | 0.433 | 0.375 | 0.404 | 0.029 | ns |
|  | 300 | 0.334 | 0.354 | 0.367 | 0.351 | 0.016 | * |
| 24h | 0 | 0.925 | 0.804 | 0.853 | 0.860 | 0.060 |  |
|  | 100 | 0.872 | 0.835 | 0.742 | 0.816 | 0.066 | ns |
|  | 150 | 0.793 | 0.602 | 0.687 | 0.694 | 0.095 | ns |
|  | 200 | 0.676 | 0.582 | 0.493 | 0.583 | 0.091 | * |
|  | 250 | 0.576 | 0.575 | 0.487 | 0.546 | 0.051 | * |
|  | 300 | 0.459 | 0.444 | 0.406 | 0.436 | 0.027 | ** |
| 48h | 0 | 1.213 | 1.385 | 1.235 | 1.277 | 0.093 |  |
|  | 100 | 1.101 | 1.231 | 1.353 | 1.228 | 0.126 | ns |
|  | 150 | 0.965 | 0.968 | 0.952 | 0.961 | 0.008 | * |
|  | 200 | 0.747 | 0.713 | 0.697 | 0.719 | 0.025 | *** |
|  | 250 | 0.565 | 0.54 | 0.464 | 0.523 | 0.052 | *** |
|  | 300 | 0.479 | 0.473 | 0.421 | 0.457 | 0.031 | *** |

**Supplementary table 3. Results of Figure 3 panel B: caspase-9 activity (% of control)**

| Phloretin(μM) | data1 | data2 | data3 | Mean | Std. Deviation | P value (compare to control) |
| --- | --- | --- | --- | --- | --- | --- |
| 0 | 100 | 100 | 100 | 100 | 0 |  |
| 100 | 157.6 | 174.7 | 157.6 | 163.3 | 9.872 | *** |
| 200 | 172.3 | 186.8 | 170.6 | 176.566 | 8.902 | *** |
| 300 | 180.8 | 202.2 | 183.6 | 188.866 | 11.631 | *** |

**Supplementary table 4. Results of Figure 5 panel B: absorbance of OD450**

| Concentration(μM) | data1 | data2 | data3 | Mean | Std. Deviation | P value(compare to control) |
| --- | --- | --- | --- | --- | --- | --- |
| Control | 1.321 | 1.206 | 1.253 | 1.26 | 0.057 |  |
| Phloretin 200 | 0.727 | 0.785 | 0.693 | 0.735 | 0.046 | *** |
| Phloretin 200+GSH 50 | 0.964 | 0.848 | 0.715 | 0.842 | 0.124 | *** |
| Phloretin 200+GSH 100 | 1.165 | 1.094 | 0.996 | 1.085 | 0.084 | ns |
| Phloretin 200+GSH 200 | 1.218 | 1.165 | 1.014 | 1.132 | 0.105 | ns |
| Control | 1.068 | 1.371 | 1.193 | 1.210 | 0.152 |  |
| Phloretin 200 | 0.402 | 0.489 | 0.425 | 0.438 | 0.045 | *** |
| Phloretin 200+NAC 100 | 0.688 | 0.683 | 0.702 | 0.691 | 0.009 | *** |
| Phloretin 200+NAC 200 | 0.768 | 0.697 | 0.689 | 0.718 | 0.043 | *** |
| Phloretin 200+NAC 300 | 0.867 | 0.762 | 0.723 | 0.784 | 0.074 | ** |

**Supplementary table 5. Results of Figure 5 panel C: caspase-9 activity (% of control)**

| Concentration(μM) | data1 | data2 | data3 | Mean | Std. Deviation | P value(compare to control) |
| --- | --- | --- | --- | --- | --- | --- |
| Control | 100 | 100 | 100 | 100 | 0 |  |
| Phloretin 200 | 146.6 | 151.8 | 146.8 | 148.4 | 2.946 | *** |
| Phloretin 200+GSH 50 | 115.5 | 114.9 | 113.1 | 114.5 | 1.248 | ** |
| Phloretin 200+GSH100 | 99.2 | 94.6 | 93.1 | 95.633 | 3.178 | ns |
| Phloretin 200+GSH200 | 97 | 87.7 | 87.3 | 90.666 | 5.488 | * |
| Control | 100 | 100 | 100 | 100 | 0 |  |
| Phloretin 200 | 146.6 | 151.8 | 146.8 | 148.4 | 2.946 | *** |
| Phloretin 200+NAC100 | 107.4 | 110.6 | 115.8 | 111.266 | 4.239 | * |
| Phloretin 200+NAC200 | 105 | 100 | 110 | 105 | 5 | ns |
| Phloretin 200+NAC300 | 103.7 | 103.4 | 104.2 | 103.766 | 0.404 | ns |

***, P < 0.05; **, P < 0.01; ***, P < 0.001**
